# Supplementary material
Source: PubMed Central journal article supplement (PMC2042569)
Supplement: bjpg57-212TableS1.pdf [file bjpg57-212TableS1.pdf]

Table 1. Stage of cancer at diagnosis by referral source

|                      | Urgent guideline referrals | Diagnosed through other routes |                  |                      |                          |              |         |
|----------------------|----------------------------|--------------------------------|------------------|----------------------|--------------------------|--------------|---------|
|                      |                            | Total                          | Urgent GP letter | Non-urgent GP Letter | Inter-specialty referral | A&E referral | Unknown |
|                      | n (%)                      | n (%)                          | n (%)            | n (%)                | n (%)                    | n (%)        | n (%)   |
| <b>Colorectal</b>    |                            |                                |                  |                      |                          |              |         |
| TNM stage            |                            |                                |                  |                      |                          |              |         |
| IB                   | 7 (18)                     | 20 (15)                        | 3 (7)            | 11 (29)              | 4 (13)                   | 1 (7)        | 1 (9)   |
| IIB                  | 13 (34)                    | 39 (29)                        | 15 (37)          | 10 (26)              | 9 (30)                   | 3 (20)       | 2 (18)  |
| IIIA                 | 8 (31)                     | 42 (31)                        | 13 (32)          | 13 (34)              | 9 (30)                   | 5 (33)       | 2 (18)  |
| IIIB                 | 7 (18)                     | 21 (16)                        | 4 (10)           | 1 (3)                | 6 (20)                   | 4 (27)       | 6 (55)  |
| IV                   | 3 (8)                      | 13 (10)                        | 6 (15)           | 3 (8)                | 2 (7)                    | 2 (13)       | 0 (0)   |
| Total                | 38                         | 135                            | 41               | 38                   | 30                       | 15           | 11      |
| Duke's stage         |                            |                                |                  |                      |                          |              |         |
| A                    | 4 (12)                     | 23 (18)                        | 2 (6)            | 13 (32)              | 4 (14)                   | 2 (15)       | 2 (17)  |
| B                    | 14 (42)                    | 48 (37)                        | 18 (50)          | 11 (27)              | 9 (32)                   | 4 (31)       | 6 (50)  |
| C                    | 15 (46)                    | 56 (43)                        | 16 (44)          | 17 (42)              | 13 (46)                  | 6 (46)       | 4 (33)  |
| D                    | 0 (0)                      | 3 (2)                          | 0 (0)            | 0 (0)                | 2 (7)                    | 1 (8)        | 0 (0)   |
| Total                | 33                         | 130                            | 36               | 41                   | 28                       | 13           | 12      |
| <b>Lung</b>          |                            |                                |                  |                      |                          |              |         |
| TNM stage            |                            |                                |                  |                      |                          |              |         |
| Stage IA             | 1 (6)                      | 10 (14)                        | 1 (50)           | 2 (33)               | 7 (16)                   | 0 (0)        | 0 (0)   |
| Stage IB             | 3 (17)                     | 15 (21)                        | 0 (0)            | 1 (17)               | 13 (29)                  | 0 (0)        | 1 (6)   |
| Stage IIB            | 0 (0)                      | 16 (22%)                       | 0 (0)            | 1 (17)               | 13 (29)                  | 0 (0)        | 1 (6)   |
| Stage IIIA           | 5 (28)                     | 15 (21%)                       | 1 (50)           | 0 (0)                | 8 (18)                   | 1 (50)       | 5 (29)  |
| Stage IIIB           | 4 (22)                     | 3 (4)                          | 0 (0)            | 0 (0)                | 1 (2)                    | 0 (0)        | 2 (12)  |
| Stage IV             | 5 (28)                     | 13 (18)                        | 0 (0)            | 1 (17)               | 3 (7)                    | 1 (50)       | 8 (47)  |
| Total                | 18                         | 72                             | 2                | 6                    | 45                       | 2            | 17      |
| Extensive or limited |                            |                                |                  |                      |                          |              |         |
| Limited              | 4 (15)                     | 41 (46)                        | 1 (33)           | 5 (83)               | 33 (69)                  | 0 (0)        | 2 (7)   |
| Extensive            | 23 (85)                    | 48 (54)                        | 2 (67)           | 1 (17)               | 15 (31)                  | 2 (100)      | 28 (93) |
| Total                | 27                         | 89                             | 3                | 6                    | 48                       | 2            | 30      |
| <b>Ovarian</b>       |                            |                                |                  |                      |                          |              |         |
| I                    | 1 (13)                     | 7 (19)                         | 0 (0)            | 4 (21)               | 2 (20)                   | 0 (0)        | 1 (14)  |
| II                   | 1 (13)                     | 3 (8)                          | 0 (0)            | 2 (11)               | 1 (10)                   | 0 (0)        | 0 (0)   |
| III                  | 3 (38)                     | 21 (57)                        | 0 (0)            | 9 (47)               | 5 (50)                   | 1 (100)      | 6 (86)  |
| IV                   | 3 (38)                     | 6 (16)                         | 0 (0)            | 4 (21)               | 2 (20)                   | 0 (0)        | 0 (0)   |
| Total                | 8                          | 37                             | 0                | 19                   | 10                       | 1            | 7       |
| <b>Prostate</b>      |                            |                                |                  |                      |                          |              |         |
| T Stage              |                            |                                |                  |                      |                          |              |         |
| T1                   | 2 (9)                      | 4 (9)                          | 0 (0)            | 4 (13)               | 0 (0)                    | 0 (0)        | 0 (0)   |
| T2                   | 8 (36)                     | 13 (30)                        | 1 (25)           | 10 (33)              | 1 (13)                   | 0 (0)        | 1 (100) |
| T3                   | 8 (36)                     | 22 (51)                        | 3 (75)           | 15 (50)              | 4 (50)                   | 0 (0)        | 0 (0)   |
| T4                   | 4 (18)                     | 4 (9)                          | 0 (0)            | 1 (3)                | 3 (37)                   | 0 (0)        | 0 (0)   |
| Total                | 22                         | 43                             | 4                | 30                   | 8                        |              | 1       |
| Gleason score        |                            |                                |                  |                      |                          |              |         |
| Moderate (5-7)       | 33 (94)                    | 77 (91)                        | 5 (63)           | 54 (95)              | 8 (89)                   | 7 (88)       | 3 (100) |
| High (8-10)          | 2 (6)                      | 8 (9)                          | 3 (37)           | 3 (5)                | 1 (11)                   | 1 (12)       | 0 (0)   |
| Total                | 35                         | 85                             | 8                | 57                   | 9                        | 8            | 3       |
