# Supplementary material
Source: PubMed Central journal article supplement (PMC2042569)
Supplement: bjpg57-212TableS2.pdf [file bjpg57-212TableS2.pdf]

**Table 2. Referral and secondary care delays by referral source.**

|                            | Urgent guideline referrals | Diagnosed through other routes |                    |                        |                          |              | A&E           | Unknown |
|----------------------------|----------------------------|--------------------------------|--------------------|------------------------|--------------------------|--------------|---------------|---------|
|                            |                            | Total <sup>a</sup>             | GP – Urgent letter | GP – Non-urgent letter | Inter-specialty referral |              |               |         |
| <b>Colorectal</b>          |                            |                                |                    |                        |                          |              |               |         |
| Referral delays            |                            |                                |                    |                        |                          |              |               |         |
| Mean delay in days (sd)    | 11.9 (5.3)                 | 14.9 (26.5)                    | 6.4 (8.6)          | 32.8 (39.5)            | n/a                      | n/a          | n/a           | n/a     |
| Median delay in days (IQR) | 12 (9 – 13)                | 8 (0 – 21.7)                   | 2 (0 – 13)         | 23 (17 – 35)           | n/a                      | n/a          | n/a           | n/a     |
| % seen within 2 weeks      | 86%                        | 49%                            | 81%                | 14%                    | n/a                      | n/a          | n/a           | n/a     |
| Secondary care delays      |                            |                                |                    |                        |                          |              |               |         |
| Mean delay in days (sd)    | 44.2 (47.4)                | 53.4 (85.3)                    | 30.4 (42.1)        | 107.5 (117.7)          | 20.3 (55.0)              | 41.0 (70.0)  | 50.0 (60.3)   |         |
| Median delay in days (IQR) | 30 (14 – 61)               | 21 (4.7 – 63.5)                | 14 (3 – 42)        | 67 (21 – 165)          | 8 (0 – 25)               | 15 (9 – 35)  | 50 (12 – 95)  |         |
| <b>Lung</b>                |                            |                                |                    |                        |                          |              |               |         |
| Referral delays            |                            |                                |                    |                        |                          |              |               |         |
| Mean delay in days (sd)    | 9.1 (4.8)                  | 14.1 (16.1)                    | 13.6 (14.5)        | 17.6 (17.8)            | n/a                      | n/a          | n/a           | n/a     |
| Median delay in days (IQR) | 10 (6 – 13)                | 10 (4 – 17)                    | 9 (3 – 18)         | 12 (4 – 28)            | n/a                      | n/a          | n/a           | n/a     |
| % seen within 2 weeks      | 89%                        | 57%                            | 60%                | 55%                    | n/a                      | n/a          | n/a           | n/a     |
| Secondary care delays      |                            |                                |                    |                        |                          |              |               |         |
| Mean delay in days (sd)    | 25.2 (24.7)                | 25.3 (36.0)                    | 28.9 (40.0)        | 26.6 (25.7)            | 24.0 (40.5)              | 36.1 (49.7)  | 20.2 (25.4)   |         |
| Median delay in days (IQR) | 18 (8 – 36)                | 15 (4 – 28)                    | 14 (4 – 25)        | 19 (14 – 35)           | 14 (4 – 28)              | 28 (4 – 42)  | 14.0 (8 – 23) |         |
| <b>Ovarian</b>             |                            |                                |                    |                        |                          |              |               |         |
| Referral delays            |                            |                                |                    |                        |                          |              |               |         |
| Mean delay in days (sd)    | 12.1 (5.7)                 | 50.3 (113.3)                   | 16.0 (16.9)        | 72.9 (143.2)           | n/a                      | n/a          | n/a           | n/a     |
| Median delay in days (IQR) | 12 (8 – 15)                | 23 (10.5– 39.5)                | 14 (3 – 21)        | 31 (21 – 57)           | n/a                      | n/a          | n/a           | n/a     |
| % seen within 2 weeks      | 75%                        | 26%                            | 58%                | 9%                     | n/a                      | n/a          | n/a           | n/a     |
| Secondary care delays      |                            |                                |                    |                        |                          |              |               |         |
| Mean delay in days (sd)    | 39.4 (38.5)                | 58.1 (52.9)                    | 46.6 (32.2)        | 82.3 (63.1)            | 34.3 (18.9)              | 18.7 (3.01)  | 30.1 (24.6)   |         |
| Median delay in days (IQR) | 31 (4 – 60)                | 44.5 (20 – 81.7)               | 47 (17 – 76)       | 69 (25 – 107)          | 37 (15 – 49)             | 18 (16 – 18) | 26 (14 – 42)  |         |
| <b>Prostate</b>            |                            |                                |                    |                        |                          |              |               |         |
| Referral delays            |                            |                                |                    |                        |                          |              |               |         |
| Mean delay in days (sd)    | 14.2 (17.6)                | 43.4 (37.9)                    | 38.0 (35.9)        | 53.3 (37.3)            | n/a                      | n/a          | n/a           | n/a     |
| Median delay in days (IQR) | 13 (8 – 15)                | 40 (13.2 – 58)                 | 30 (13 – 41)       | 48 (28 – 71)           | n/a                      | n/a          | n/a           | n/a     |
| % seen within 2 weeks      | 68%                        | 16%                            | 25%                | 15%                    | n/a                      | n/a          | n/a           | n/a     |
| Secondary care delays      |                            |                                |                    |                        |                          |              |               |         |
| Mean delay in days (sd)    | 103.8 (64.9)               | 126.2 (80.6)                   | 116.0 (99.3)       | 128.9 (77.0)           | 86.7 (82.3)              | 126.4 (82.3) | -             |         |
| Median delay in days (IQR) | 87 (61 – 140)              | 103 (71– 72.5)                 | 99 (51 – 121)      | 118 (77– 155)          | 70 (11 – 146)            | 116 (66–188) | -             |         |

<sup>a</sup>Totals calculated from data available and therefore exclude the non-applicables (e.g. secondary care delay cannot be calculated from secondary care referrals).
